# Supplementary material
Source: publisher site journal article supplement (https://www.dovepress.com/article/438031)
Supplement: Supplementary file 1 [file get_supplementary_file.php]

## **Appendix 1: Confounders and propensity matching, extended**

To account for confounders, propensity score matching was undertaken prior to statistical analysis. Inclusion in the matching process required a covariate to have no more than 20% missing data. Where data were missing, a variable was encoded into a categorical variable with a category added for the observations with missing values. The propensity score was generated from logistic regression modelling using all available patient-level baseline characteristics that were expected on clinical grounds to be related to the outcome or to both the outcome and treatment allocation (age, gender, body mass index, smoking status, season of index date, comorbidities, recent exacerbation history, recent acute oral corticosteroid use, recent antibiotics for a lower-respiratory tract infection indication, ICS average daily dose in baseline year and pulmonary function measurements). The logit of the propensity score was used as the matching scale with a calliper width equal to 0.2 of the standard deviation of the logit of the propensity score, in line with the recommendations of Austin (2011).

Matching rate (>60% of smaller treatment group matched) and multivariable balance (<90% of baseline variables showing <10% standard mean difference) were used to establish criteria for accepting a matching set. Residual bias potential after propensity matching was assessed using the relative change in coefficient of the treatment when each baseline characteristic was added into the outcome model fitted to the propensity score matched samples. Where bias statistics were at least 2%, baseline variables were added to the outcome model in a forward selection approach, in descending order of highest bias potential.

**Appendix 2: Table 1 extended: Further demographic and clinical features of unmatched and matched populations commencing formulations containing extrafine beclometasone/long-acting bronchodilators (ef-BDP/LABD) or long-acting bronchodilators (LABD).**

| Variable                         |               | Unmatched                          |                              | Matched                            |                             |
|----------------------------------|---------------|------------------------------------|------------------------------|------------------------------------|-----------------------------|
|                                  |               | Initiating ef-BDP/LABD<br>n = 5561 | Initiating LABD<br>n = 18492 | Initiating ef-BDP/LABD<br>n = 5142 | Initiating LABD<br>n = 5142 |
| Season of index date             | Spring, n (%) | 1625 (29.2)                        | 5116 (27.7)                  | 1481 (28.8)                        | 1445 (28.1)                 |
|                                  | Summer, n (%) | 1257 (22.6)                        | 4277 (23.1)                  | 1152 (22.4)                        | 1198 (23.3)                 |
|                                  | Autumn, n (%) | 1248 (22.4)                        | 4076 (22.0)                  | 1161 (22.6)                        | 1125 (21.9)                 |
|                                  | Winter, n (%) | 1431 (25.7)                        | 5023 (27.2)                  | 1348 (26.2)                        | 1374 (26.7)                 |
| <b>Comorbidities</b>             |               |                                    |                              |                                    |                             |
| Mental disorder                  | Yes, n (%)    | 103 (1.9)                          | 374 (2.0)                    | 96 (1.9)                           | 88 (1.7)                    |
| Glaucoma                         | Yes, n (%)    | 168 (3.0)                          | 563 (3.0)                    | 156 (3.0)                          | 155 (3.0)                   |
| Cataract                         | Yes, n (%)    | 712 (12.8)                         | 2444 (13.2)                  | 655 (12.7)                         | 633 (12.3)                  |
| Atrial fibrillation              | Yes, n (%)    | 380 (6.8)                          | 1411 (7.6)                   | 350 (6.8)                          | 353 (6.9)                   |
| Moderate renal impairment        | Yes, n (%)    | 548 (9.9)                          | 1857 (10.0)                  | 507 (9.9)                          | 479 (9.3)                   |
| Pneumonia in baseline            | Yes, n (%)    | 144 (2.6)                          | 359 (1.9)                    | 125 (2.4)                          | 118 (2.3)                   |
| Bronchiectasis                   | Yes, n (%)    | 123 (2.2)                          | 274 (1.5)                    | 102 (2.0)                          | 115 (2.2)                   |
| Hypertension                     | Yes, n (%)    | 3430 (37.2)                        | 7249 (39.2)                  | 1756 (34.2)                        | 1739 (33.8)                 |
| Cardiovascular disease           | Yes, n (%)    | 1535 (27.6)                        | 5648 (30.5)                  | 1409 (27.4)                        | 1405 (27.3)                 |
| Coronary heart disease           | Yes, n (%)    | 699 (12.6)                         | 2733 (14.8)                  | 652 (12.7)                         | 633 (12.3)                  |
| Myocardial infarction            | Yes, n (%)    | 388 (7.0)                          | 1522 (8.2)                   | 361 (7.0)                          | 356 (6.9)                   |
| Cerebrovascular accident         | Yes, n (%)    | 266 (4.8)                          | 1039 (5.6)                   | 250 (4.9)                          | 256 (5.0)                   |
| Heart failure                    | Yes, n (%)    | 248 (4.5)                          | 791 (4.3)                    | 221 (4.3)                          | 231 (4.5)                   |
| Ischaemic heart disease          | Yes, n (%)    | 772 (13.9)                         | 2951 (16.0)                  | 718 (14.0)                         | 686 (13.3)                  |
| Diabetes diagnosis or medication | Yes, n (%)    | 771 (13.9)                         | 2658 (14.4)                  | 714 (13.9)                         | 732 (14.2)                  |

|                                                |                       |             |              |             |              |
|------------------------------------------------|-----------------------|-------------|--------------|-------------|--------------|
| Osteoporosis                                   | Yes, n (%)            | 286 (5.1)   | 996 (5.4)    | 256 (5.0)   | 254 (4.9)    |
| Parkinson disease                              | Yes, n (%)            | 15 (0.3)    | 62 (0.3)     | 14 (0.3)    | 18 (0.4)     |
| Sleep disorder                                 | Yes, n (%)            | 674 (12.1)  | 2291 (12.4)  | 633 (12.3)  | 613 (11.9)   |
| LAMA before index date                         | No LAMA, n (%)        | 3209 (57.7) | -            | 3106 (60.4) | -            |
|                                                | Glycopyrronium, n (%) | 318 (5.7)   | -            | 262 (5.1)   | -            |
|                                                | Tiotropium, n (%)     | 1506 (27.1) | -            | 1315 (25.6) | -            |
|                                                | Acclidinium, n (%)    | 277 (5.0)   | -            | 237 (4.6)   | -            |
|                                                | Umeclidinium, n (%)   | 251 (4.5)   | -            | 222 (4.3)   | -            |
| LABA (mono or FDC) prescriptions               | 0, n (%)              | 4516 (81.2) | -            | 4279 (83.2) | 5142 (100.0) |
|                                                | 1-2, n (%)            | 280 (5.0)   | -            | 261 (5.1)   | 0 (0.0)      |
|                                                | 3-5, n (%)            | 233 (4.2)   | -            | 199 (3.9)   | 0 (0.0)      |
|                                                | 6-9, n (%)            | 261 (4.7)   | -            | 199 (3.9)   | 0 (0.0)      |
|                                                | ≥10, n (%)            | 271 (4.9)   | -            | 204 (4.0)   | 0 (0.0)      |
| LAMA prescriptions                             | 0, n (%)              | 3209 (57.7) | -            | 3106 (60.4) | 5142 (100.0) |
|                                                | 1-2, n (%)            | 565 (10.2)  | -            | 535 (10.4)  | 0 (0.0)      |
|                                                | 3-5, n (%)            | 568 (10.2)  | -            | 499 (9.7)   | 0 (0.0)      |
|                                                | 6-9, n (%)            | 537 (9.7)   | -            | 453 (8.8)   | 0 (0.0)      |
|                                                | ≥10, n (%)            | 682 (12.3)  | -            | 549 (10.7)  | 0 (0.0)      |
| SABA prescriptions                             | 0, n (%)              | 1794 (32.3) | 7963 (43.1)  | 1771 (34.4) | 1827 (35.5)  |
|                                                | 1-2, n (%)            | 1440 (25.9) | 6283 (34.0)  | 1420 (27.6) | 1370 (26.6)  |
|                                                | 3-5, n (%)            | 900 (16.2)  | 2162 (11.7)  | 828 (16.1)  | 799 (15.5)   |
|                                                | 6-9, n (%)            | 700 (12.6)  | 1193 (6.5)   | 584 (11.4)  | 582 (11.3)   |
|                                                | ≥10, n (%)            | 727 (13.1)  | 891 (4.8)    | 539 (10.5)  | 564 (11.0)   |
| SAMA prescriptions                             | ≥1, n (%)             | 192 (3.5)   | 667 (3.6)    | 181 (3.5)   | 189 (3.7)    |
| Theophylline prescriptions                     | ≥1, n (%)             | 29 (0.5)    | 16 (0.1)     | 10 (0.2)    | 14 (0.3)     |
| Leukotriene Receptor Antagonists prescriptions | ≥1, n (%)             | 23 (0.4)    | 30 (0.2)     | 15 (0.3)    | 18 (0.4)     |
| Macrolides prescriptions                       | 0, n (%)              | 4762 (85.6) | 16295 (88.1) | 4436 (86.3) | 4417 (85.9)  |
|                                                | 1, n (%)              | 510 (9.2)   | 1599 (8.6)   | 461 (9.0)   | 478 (9.3)    |
|                                                | 2, n (%)              | 176 (3.2)   | 401 (2.2)    | 152 (3.0)   | 153 (3.0)    |
|                                                | 3, n (%)              | 57 (1.0)    | 117 (0.6)    | 51 (1.0)    | 54 (1.1)     |
|                                                | 4, n (%)              | 28 (0.5)    | 40 (0.2)     | 21 (0.4)    | 19 (0.4)     |

|                     |                  |             |              |             |             |
|---------------------|------------------|-------------|--------------|-------------|-------------|
|                     | ≥5, n (%)        | 28 (0.5)    | 40 (0.2)     | 21 (0.4)    | 21 (0.4)    |
|                     | 0, n (%)         | 5161 (92.8) | 17993 (97.3) | 4864 (94.6) | 4875 (94.8) |
| Mucolytics          | 1, n (%)         | 167 (3.0)   | 255 (1.4)    | 129 (2.5)   | 121 (2.4)   |
| prescriptions       | 2, n (%)         | 50 (0.9)    | 62 (0.3)     | 35 (0.7)    | 30 (0.6)    |
|                     | ≥3, n (%)        | 183 (3.3)   | 182 (1.0)    | 114 (2.2)   | 116 (2.3)   |
| Maintenance OCS     | ≥1, n (%)        | 136 (2.4)   | 264 (1.4)    | 113 (2.2)   | 115 (2.2)   |
| prescriptions       |                  |             |              |             |             |
| Oral                | 0, n (%)         | 3059 (55.0) | 13723 (74.2) | 3033 (59.0) | 3031 (58.9) |
| corticosteroids,    | >0 <2.5, n (%)   | 2146 (38.6) | 4353 (23.5)  | 1890 (36.8) | 1878 (36.5) |
| average daily dose  | ≥2.5 <7.5, n (%) | 302 (5.4)   | 305 (1.6)    | 171 (3.3)   | 180 (3.5)   |
| (mg)                | ≥7.5, n (%)      | 54 (1.0)    | 111 (0.6)    | 48 (0.9)    | 53 (1.0)    |
| Influenza           | Yes, n (%)       | 2464 (44.3) | 8167 (44.2)  | 2232 (43.4) | 2256 (43.9) |
| vaccination         |                  |             |              |             |             |
| Pneumococcal        | Yes, n (%)       | 651 (11.7)  | 2206 (11.9)  | 595 (11.6)  | 584 (11.4)  |
| vaccination         |                  |             |              |             |             |
|                     | 0, n (%)         | 2290 (41.2) | 9978 (54.0)  | 2268 (44.1) | 2304 (44.8) |
|                     | 1, n (%)         | 1453 (26.1) | 5194 (28.1)  | 1407 (27.4) | 1373 (26.7) |
| Exacerbations       | 2, n (%)         | 895 (16.1)  | 2090 (11.3)  | 812 (15.8)  | 803 (15.6)  |
|                     | 3, n (%)         | 455 (8.2)   | 774 (4.2)    | 363 (7.1)   | 374 (7.3)   |
|                     | 4, n (%)         | 233 (4.2)   | 282 (1.5)    | 167 (3.2)   | 159 (3.1)   |
|                     | ≥5, n (%)        | 235 (4.2)   | 174 (0.9)    | 125 (2.4)   | 129 (2.5)   |
|                     | 0, n (%)         | 3293 (59.2) | 14296 (77.3) | 3253 (63.3) | 3244 (63.1) |
|                     | 1, n (%)         | 1230 (22.1) | 2997 (16.2)  | 1158 (22.5) | 1154 (22.4) |
| Acute OCS           | 2, n (%)         | 548 (9.9)   | 777 (4.2)    | 446 (8.7)   | 440 (8.6)   |
| courses             | 3, n (%)         | 245 (4.8)   | 264 (1.4)    | 169 (3.3)   | 175 (3.4)   |
|                     | 4, n (%)         | 121 (2.2)   | 101 (0.5)    | 71 (1.4)    | 76 (1.5)    |
|                     | ≥5, n (%)        | 124 (2.2)   | 57 (0.3)     | 45 (0.9)    | 53 (1.0)    |
|                     | 0, n (%)         | 3265 (58.7) | 12250 (65.2) | 3119 (60.7) | 3188 (62.0) |
|                     | 1, n (%)         | 1246 (22.4) | 3928 (21.2)  | 1143 (22.2) | 1087 (21.1) |
| Antibiotics courses | 2, n (%)         | 565 (10.2)  | 1469 (7.9)   | 502 (9.8)   | 492 (9.6)   |
|                     | 3, n (%)         | 269 (4.8)   | 523 (2.8)    | 217 (4.2)   | 223 (4.3)   |
|                     | 4, n (%)         | 118 (2.1)   | 193 (1.0)    | 91 (1.8)    | 77 (1.5)    |
|                     | ≥5, n (%)        | 98 (1.8)    | 129 (0.7)    | 70 (1.4)    | 75 (1.5)    |
|                     | <5, n (%)        | 1068 (19.2) | 2657 (14.4)  | 1020 (19.8) | 1040 (20.2) |
| Primary care        | 5 <10, n (%)     | 1539 (27.7) | 6074 (32.8)  | 1465 (28.5) | 1461 (28.4) |
| service contact     | 10 <15, n (%)    | 1339 (24.1) | 4770 (25.8)  | 1237 (24.1) | 1214 (23.6) |
|                     | 15 <20, n (%)    | 766 (13.8)  | 2451 (13.3)  | 673 (13.1)  | 696 (13.5)  |

|                                                    |               |             |              |             |             |
|----------------------------------------------------|---------------|-------------|--------------|-------------|-------------|
|                                                    | 20 <30, n (%) | 616 (11.1)  | 1870 (10.1)  | 541 (10.5)  | 544 (10.6)  |
|                                                    | ≥30, n (%)    | 233 (4.2)   | 670 (3.6)    | 206 (4.0)   | 187 (3.6)   |
| <hr/>                                              |               |             |              |             |             |
| GP consultations<br>with respiratory<br>indication | 0, n (%)      | 333 (6.0)   | 519 (2.8)    | 646 (12.6)  | 638 (12.4)  |
|                                                    | 1, n (%)      | 177 (3.2)   | 309 (1.7)    | 918 (17.9)  | 955 (18.6)  |
|                                                    | 2, n (%)      | 150 (2.7)   | 400 (2.2)    | 1028 (20.0) | 1013 (19.7) |
|                                                    | 3, n (%)      | 188 (3.4)   | 607 (3.3)    | 845 (16.4)  | 870 (16.9)  |
|                                                    | 4-5, n (%)    | 506 (9.1)   | 1861 (10.1)  | 996 (19.4)  | 958 (18.6)  |
|                                                    | ≥6, n (%)     | 4207 (75.7) | 14796 (80.0) | 709 (13.8)  | 708 (13.8)  |

---
